# Supplementary material for: Long-term aerosol optical hygroscopicity study at the ACTRIS SIRTA observatory: synergy between ceilometer and in-situ measurements
Source: Copernicus journal article supplement (doi:10.5194/acp-2019-12), 2019-03-04

## Long-term aerosol optical hygroscopicity study at the ACTRIS SIRTa observatory: synergy between ceilometer and in-situ measurements

Andrés Esteban Bedoya-Velásquez<sup>1,2,3</sup>, Gloria Titos<sup>1,2,4</sup>, Juan Antonio Bravo-Aranda<sup>1,2</sup>, Martial Haeffelin<sup>5</sup>, Olivier Favez<sup>6</sup>, Jean-Eudes Petit<sup>7</sup>, Juan Andrés Casquero-Vera<sup>1,2</sup>, Francisco José Olmo-Reyes<sup>1,2</sup>, Elena Montilla-Rosero<sup>8</sup>, Carlos D. Hoyos<sup>9</sup>, Lucas Alados-Arboledas<sup>1,2</sup> and Juan Luis Guerrero-Rascado<sup>1,2</sup>.

### 1 Effect of beta-attenuated water vapor correction on calculated $f_\beta(RH)$ and $\gamma$ parameter

The  $\beta^{att}$  signal presents a dependency on water vapor absorption as shown in Sec. 4.2 (Eq. 7), associated with the wavelength emission. This dependency may cause direct effects over calculations retrieved by using  $\beta^{att}$ . Here, we present the correction applied to  $\beta^{att}$  and the effects on  $f_\beta(RH)$  and  $\gamma$  calculations. Figure S1 (left-panels) represents the temporal-evolution of  $\beta^{att}$ , beta attenuated water vapour corrected ( $\beta_{wv}^{att}$ ) signals over 3 h time-window, together with the temporal-evolution of  $q$ . Figure S1 (right-panels) shows the biases for beta ( $bias_\beta$ ) and  $\Delta_q$  obtained.

The quantifications are performed by means of the  $bias_\beta$  ( $\beta^{att} - \beta_{wv}^{att}$ ) and  $\Delta_q$  ( $q(t) - q(t_d)$ ) calculations. Fig. S1ac presents two cases (case 1 and case 2) with low absolute-differences in  $q$ , which produces slight changes in  $\beta_{wv}^{att}$  signal respect to  $\beta^{att}$ . On the other hand, Fig. S1eg (case 3 and case 4) show that high absolute-differences in  $q$  are linked to high changes on  $\beta_{wv}^{att}$ . The right side of the panel (Fig. S1bd, case 1 and case 2), presents the bias quantification, showing that low  $bias_\beta$  are associated with low  $\Delta_q$  and, on the contrary, Fig. S1fh (case 3 and case 4), show that increases in  $\Delta_q$  makes that  $bias_\beta$  becomes higher. This analysis leads us to conclude that no-water vapor correction will produce an overestimation of the total  $\beta$  signal, being  $\Delta_q$  the parameter that rules the  $\beta$  correction. From now, we will use  $\beta$  instead of  $\beta^{att}$  for simplicity.

To see the effect of  $\beta_{wv}^{att}$  on  $f_\beta(RH)$ , we applied the Hännel parameterization (Eq. 6, Sec. 4.1 of the manuscript) to the same 4 cases studied above. Figure S2 presents the  $f_\beta(RH)$  and the enhancement factor water vapour corrected,  $f_{\beta_{wv}^{att}}(RH)$ . The results reinforce those obtained above (Fig S1), where low/high changes in  $\Delta_q$  are linked with low/high  $bias_\beta$  and, on this way, this would affect  $f_\beta(RH)$  calculation. Additionally, the water vapour correction tends to decrease  $\gamma$  ( $\beta_{wv}^{att}$  is lower than  $\beta$ ). Therefore, cases with lower  $bias_\beta$  and  $\Delta_q$  (case 1 and case 2), exhibits lower  $bias_\gamma$  (0.02 and 0.05, respectively), meanwhile on case 3 and case 4 instead  $bias_\beta$  increase, the  $bias_\gamma$  becomes higher (0.11 and 0.09, respectively).

Once we applied the phase 2 of the methodology (Sec. 5), we obtain 94 hygroscopic potential cases for 3h time-window (Fig. S3a), 9 cases for 4h time-window (Fig. S3a) and 4 cases for 5h time-window (Fig. S3a), resulting in a total of 107 cases. To establish a bias error for this hygroscopic study, we have calculated the median of the  $\text{bias}_\beta$  and  $\Delta_q$ , highlighting two main aspects: (i) The median  $\text{bias}_\beta$  follows the median  $\Delta_q$  variability, remarking their dependency. This fact is well seen from the scatter plot (Fig. 3Sb), where these variables show a positive correlation, however the correlation coefficient is not too high ( $R^2=0.61$ ), mainly because the data dispersion increases for  $\text{bias}_\beta > 1.5 \cdot 10^{-7} \text{ m}^{-1} \cdot \text{sr}^{-1}$  and  $\Delta_q > 3.0 \text{ g/m}^3$ ; (ii) The mean bias error calculated for  $\beta_{wv}^{att}$  over the 107 potential cases evaluated is lower than  $2.5 \cdot 10^{-7} \text{ m}^{-1} \cdot \text{sr}^{-1}$  and the mean  $\Delta_q$  is lower than  $5.5 \text{ g/m}^3$ .

Fig. S4 quantifies the effect of the  $\beta_{wv}^{att}$  over  $f_\beta(RH)$  and  $\gamma$  hygroscopic properties, by means of the median  $\text{bias}_{f_\beta(RH)}$  ( $f_\beta(RH) - f_{\beta_{wv}^{att}}(RH)$ ) and the bias  $\gamma$  ( $\gamma_{\beta_{wv}^{att}} - \gamma_{\beta_{wv}^{att}}$ ). Figure S4 reveals the no-correlation between  $\text{bias}_\beta$  and  $\text{bias}_{f_\beta(RH)}$ . However, combining the results from Fig. S3 and Fig. S4, it is possible to establish that  $\text{bias}_\beta > 1 \text{ m}^{-1} \cdot \text{sr}^{-1}$  would cause an increment of  $\text{bias}_{f_\beta(RH)}$  above 0.2, increasing the error on  $f_\beta(RH)$ . Finally, it was obtained that  $\text{bias}_{f_\beta(RH)}$  and  $\text{bias}_\gamma$  for the whole study were lower than 0.3.

## 2 Results

### 2.1 Methodology applied to eight aerosol hygroscopic growth cases

The 8 hygroscopic growth cases reported in this study (Table 1, Sec. 6.2) were found at daytime in the early morning, with  $RH_{ref}$  around 50 % and the maximum RH reached was up to 90% over 3h time-window. For cases 1, 2, 4, 5, 6 and 7 the perceptual composition was dominated by OA with values up to 50 %, except on case 7 where OA decreased up to 38%. The BC concentration was relatively low almost for all cases found (close to 6 %). The concentration of inorganic compounds were dominated by  $\text{SO}_4^{2-}$  (lower than 21 %) and  $\text{NH}_4^+$  (lower than 19 %), however  $\text{NO}_3^-$  reached values of 21% on case 6. The air masses that come mainly from W-NW direction are related to case 1 ( $\Delta u=3.6 \text{ m/s W}$ ), case 2 ( $\Delta u=23.0 \text{ m/s NW}$ ) and case 6 ( $\Delta u=4.4 \text{ m/s W}$ ), with speed variability up to 14.2 %, 20.7 % and 18.5 %, respectively; and the air masses that coming from W-SW direction at low wind direction variability are associated with case 4 ( $\Delta u=2.7 \text{ m/s W}$ ), case 5 ( $\Delta u=2.4 \text{ m/s SW}$ ), and case 7 ( $\Delta u=1.7 \text{ m/s SW}$ ), and wind speed variability about 15.4 m/s, 20.4 m/s and 10.9 m/s, respectively. All these cases fulfilled the threshold established for  $\frac{\Delta f_{PM1}(RH)}{\Delta f_\beta(RH)} < 0.5$  indicating that increases/decreases in  $f_\beta(RH)$  are not related with advected aerosol into the atmospheric volume studied. The Hnnel parameterization is calculated for both  $f_\beta(RH)$  and  $f_{PM1}(RH)$  (see panel Fig. S4 to S9 b.). The hygroscopicity properties of the 6 cases presented here were evaluated and compared against literature in the Sec. 6.2 of the article.

## References

Draxler, R. R. and Rolph, G. D.: HYSPLIT (HYbrid Single-Particle Lagrangian Integrated Trajectory) Model access via NOAA ARL READY, <http://ready.arl.noaa.gov/HYSPLIT.php> (last access: July 2010), NOAA Air Resources Laboratory, Silver Spring, MD, 2012.

Zhang, L., Sun, J.Y., Shen, X.J., Zhang, Y.M., Che, H.C., Ma, Q.L., Zhang, Y.W., Zhang, X.Y., Ogren, J.A.: Observations of relative humidity effects on aerosol light scattering in the Yangtze River Delta of China. *Atmos. Chem. Phys.* 15, 8439e8454. <http://dx.doi.org/10.5194/acpd-15-2853-2015>, 2015.

Zieger, P., Fierz-Schmidhauser, R., Poulain, L., Müller, T., Birmili, W., Spindler, G., Wiedensohler, A., Baltensperger, U., Weingartner, E.: Influence of water uptake on the aerosol particle light scattering coefficients of the Central European aerosol. *Tellus B* 66, 22716. <http://dx.doi.org/10.3402/tellusb.v66.22716>, 2014.

## Figure captions

**Figure S1.** Time evolution of  $\beta^{att}$  (blue line),  $\beta_c^{att}$  (red line) and  $q$  (orange line) [left panels (a,c,e,g)  $bias_\beta$  (black line) and  $\Delta_q$  (green line) [right panel (b,d,f,h)].

**Figure S2.** Experimental data points (blue/red dots) and Hännel parameterization (blue/red lines). Case 1 and Case 2 show the effect of the lower  $bias_\beta$  and  $\Delta_q$  differences over  $f_{\beta_{wv}^{att}}(RH)$  and  $f_\beta(RH)$ . Case 3 and Case 4 present the effect of the higher  $bias_\beta$  and  $\Delta_q$  differences over  $f_{\beta_{wv}^{att}}(RH)$  and  $f_\beta(RH)$ .

**Figure S3.** Median of  $bias_\beta$  and  $\Delta_q$  for all potential cases of hygroscopic growth found from 2012 to 2016 at the ACTRS SIRTa observatory: (a) median of  $bias_\beta$  and  $\Delta_q$  to 3h time-window analysis (green bars), 4h time-window analysis (orange bars) and 5h time-window analysis (blue bars); (b) scatter plot correlating median of  $bias_\beta$  and  $\Delta_q$  for whole time-windows.

**Figure S4.**  $bias_{f_\beta(RH)}$  and  $bias_\gamma$  for all potential cases of hygroscopic growth found from 2012 to 2016 at the ACTRIS SIRTa observatory.  $bias_{f_\beta(RH)}$  and  $bias_\gamma$  for 3h time-window analysis (green bars), 4h time-window analysis (orange bars) and 5h time-window analysis (blue bars).

**Figure S5.** Criterion for data selection: case 1 on 29 July 2012 from 06:30 to 09:30 UTC.

**Figure S6.** Criterion for data selection: case 2 on 02 September 12 from 10:30 to 13:30 UTC.

**Figure S7.** Criterion for data selection: case 4 on 28 July 2014 from 09:10 to 12:10 UTC.

**Figure S8.** Criterion for data selection: case 5 on 17 August 2014 from 06:40 to 09:40 UTC.

**Figure S9.** Criterion for data selection: case 6 on 21 May 2015 from 06:15 to 09:15 UTC.

**Figure S10.** Criterion for data selection: case 7 on 15 April 2016 from 07:05 to 10:05 UTC.

**Figure S1:**

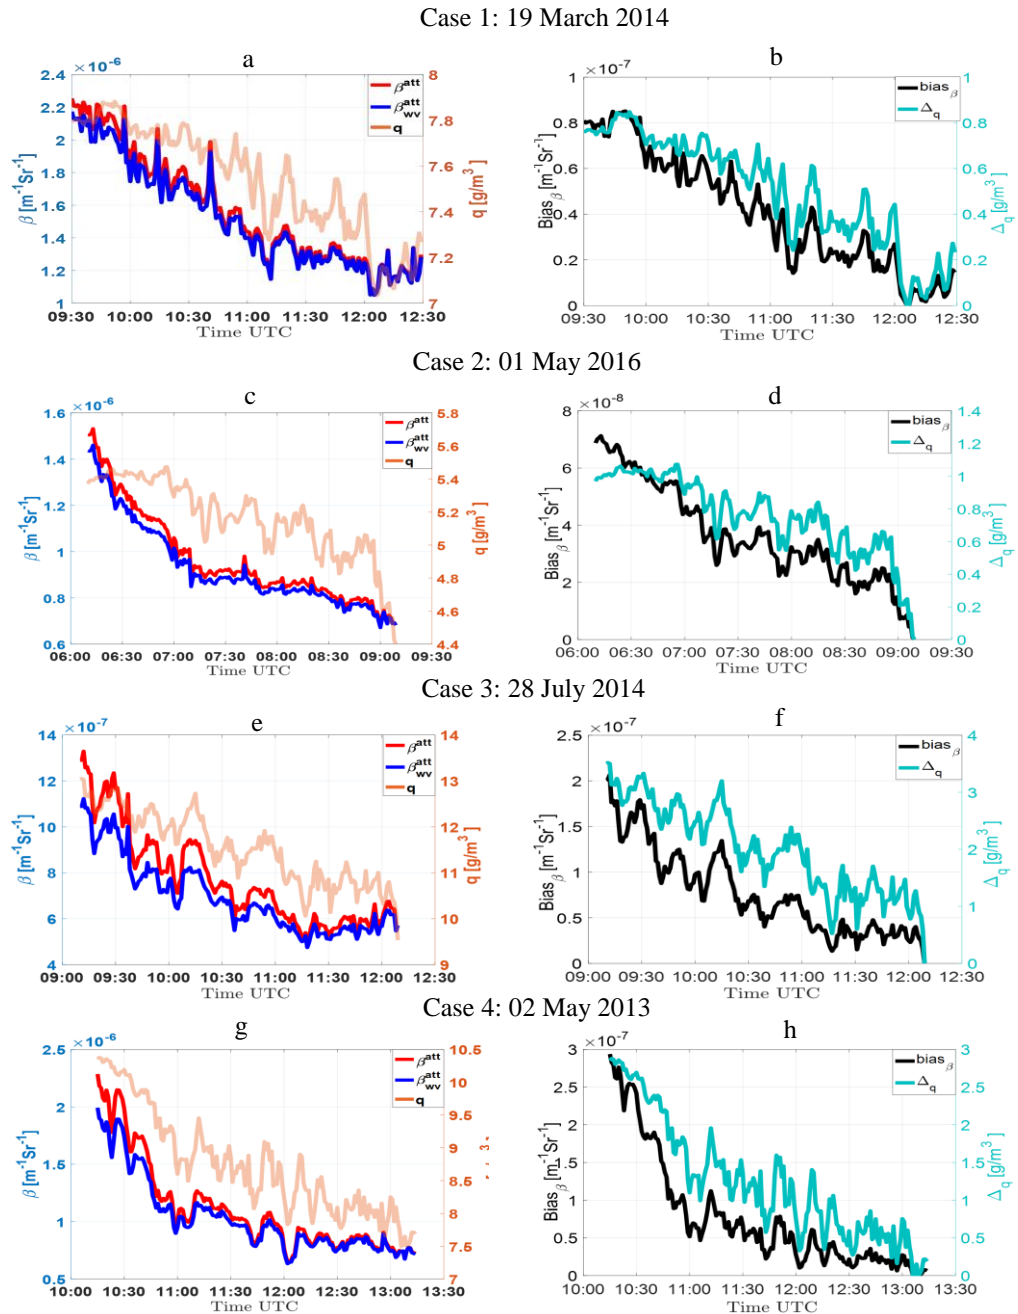

Figure S2:

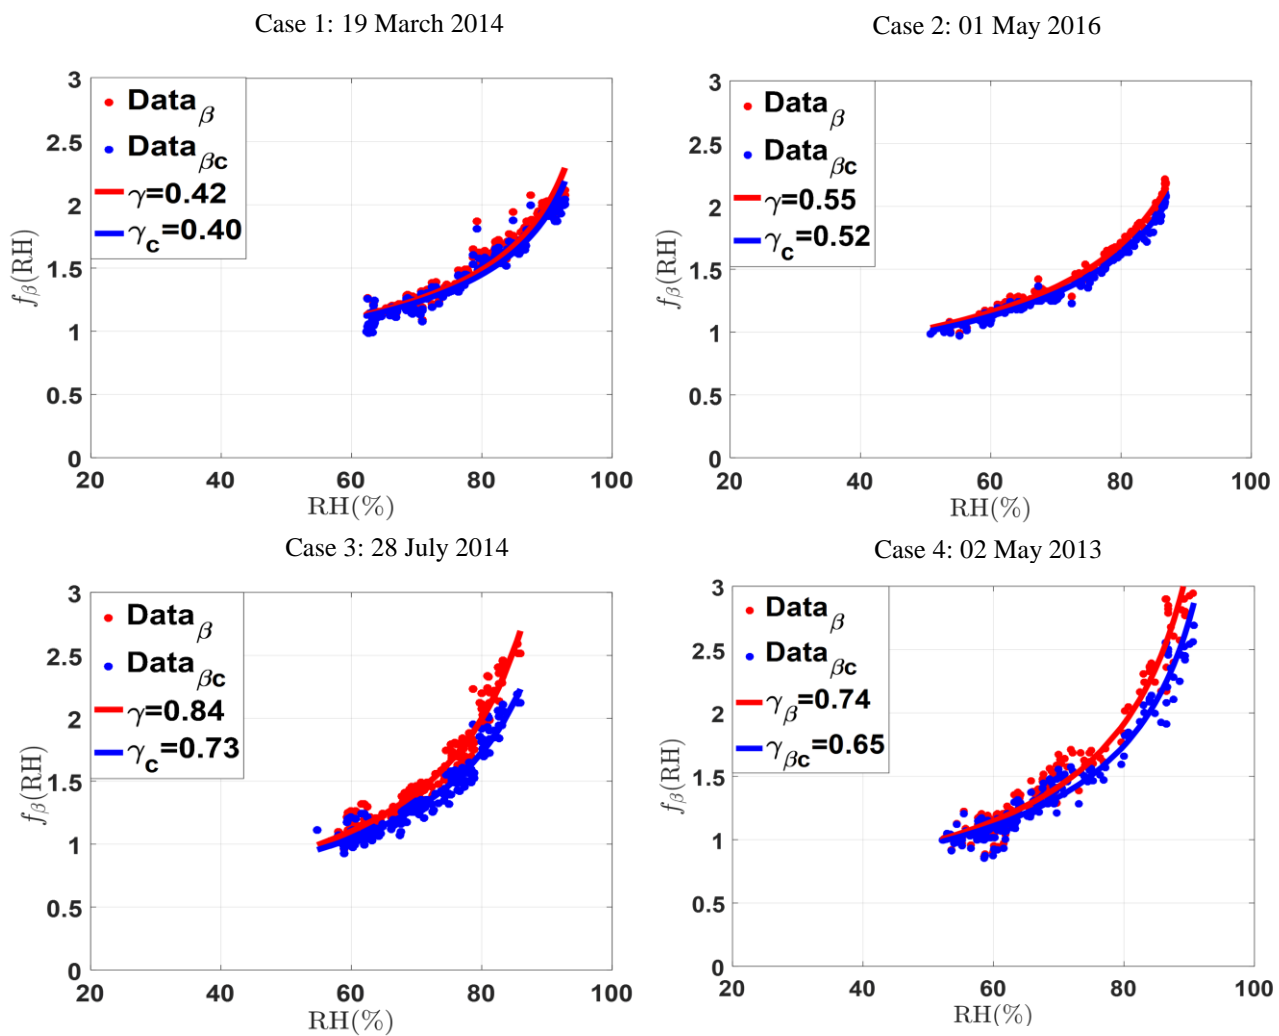

**Figure S3:**

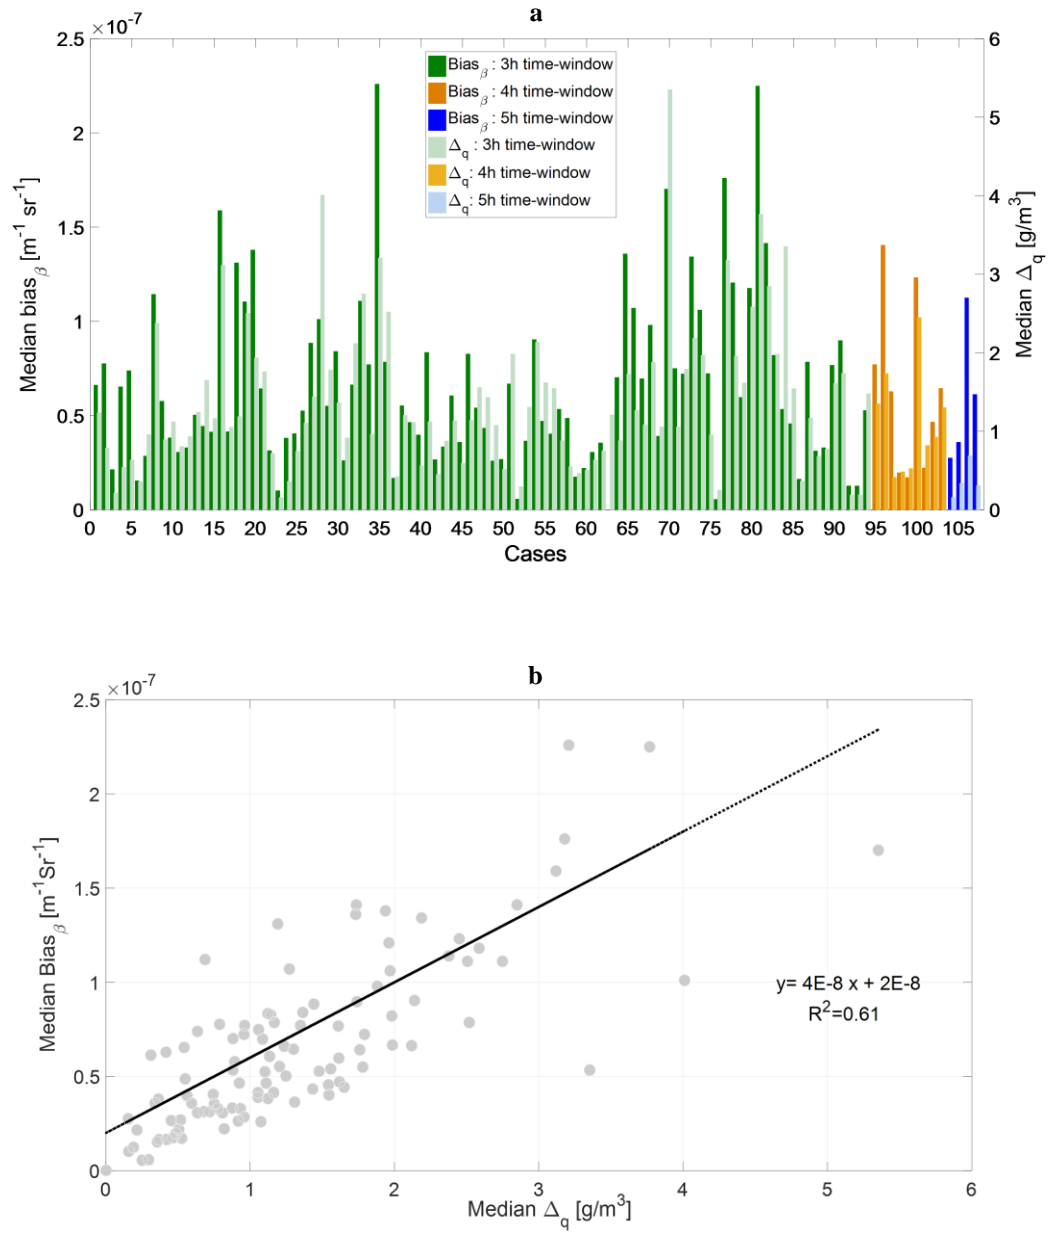

**Figure S4:**

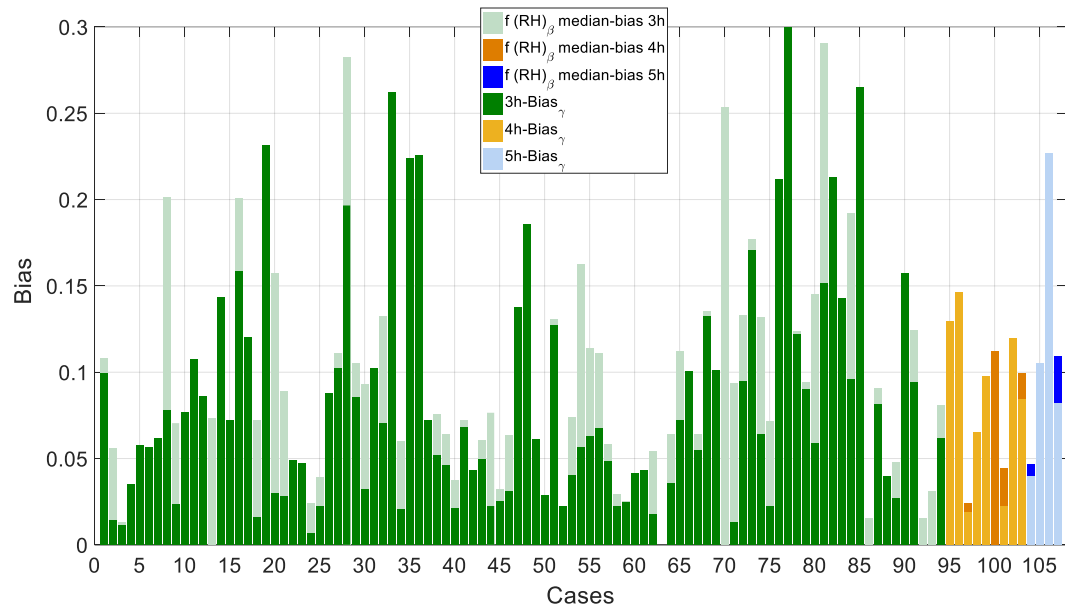

Figure S5:

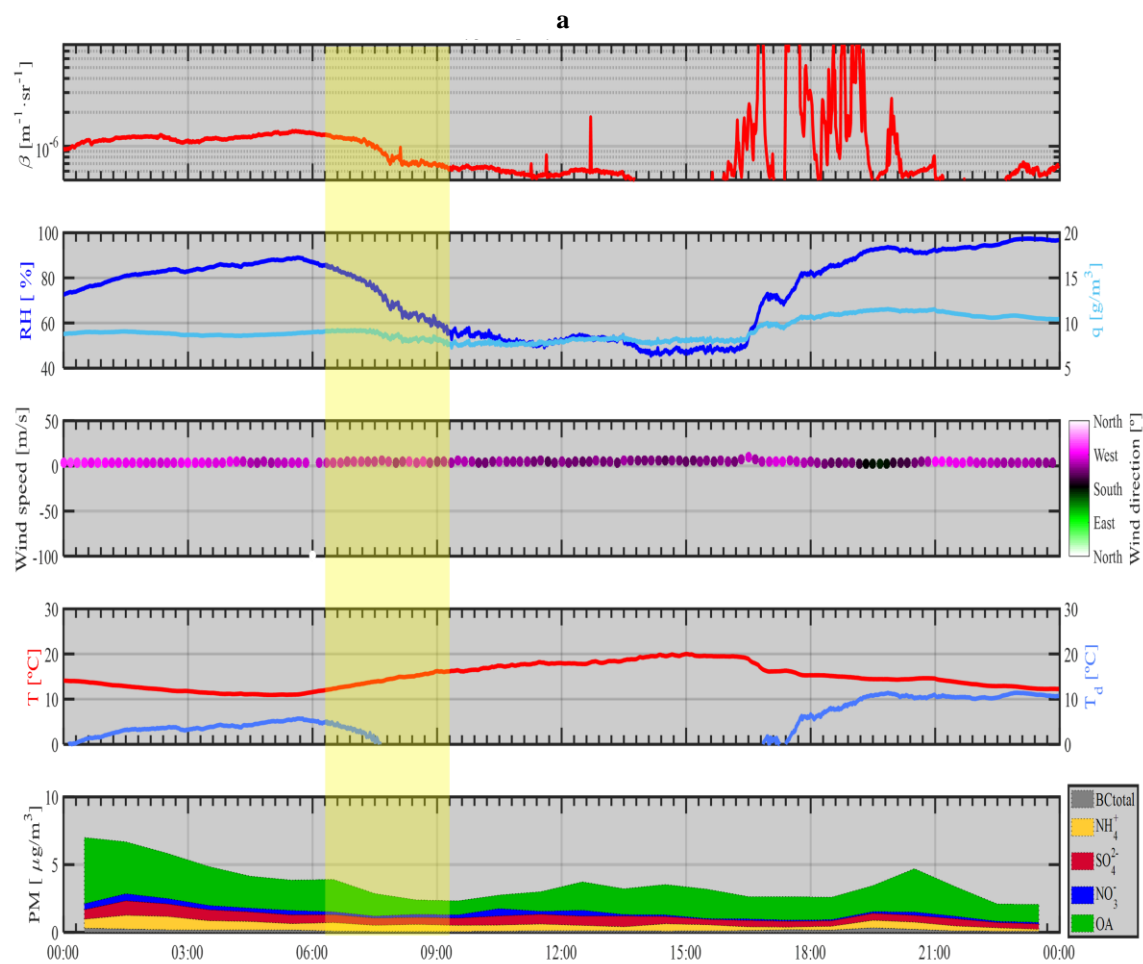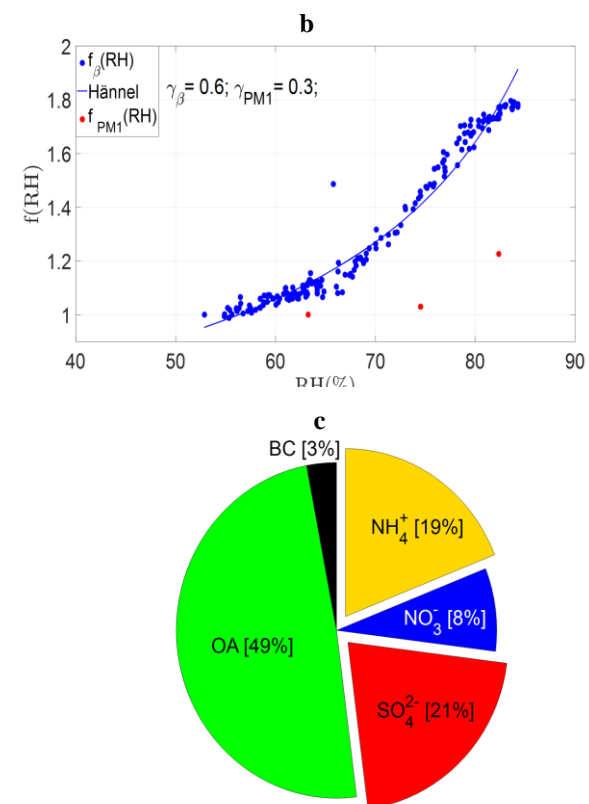

Figure S6:

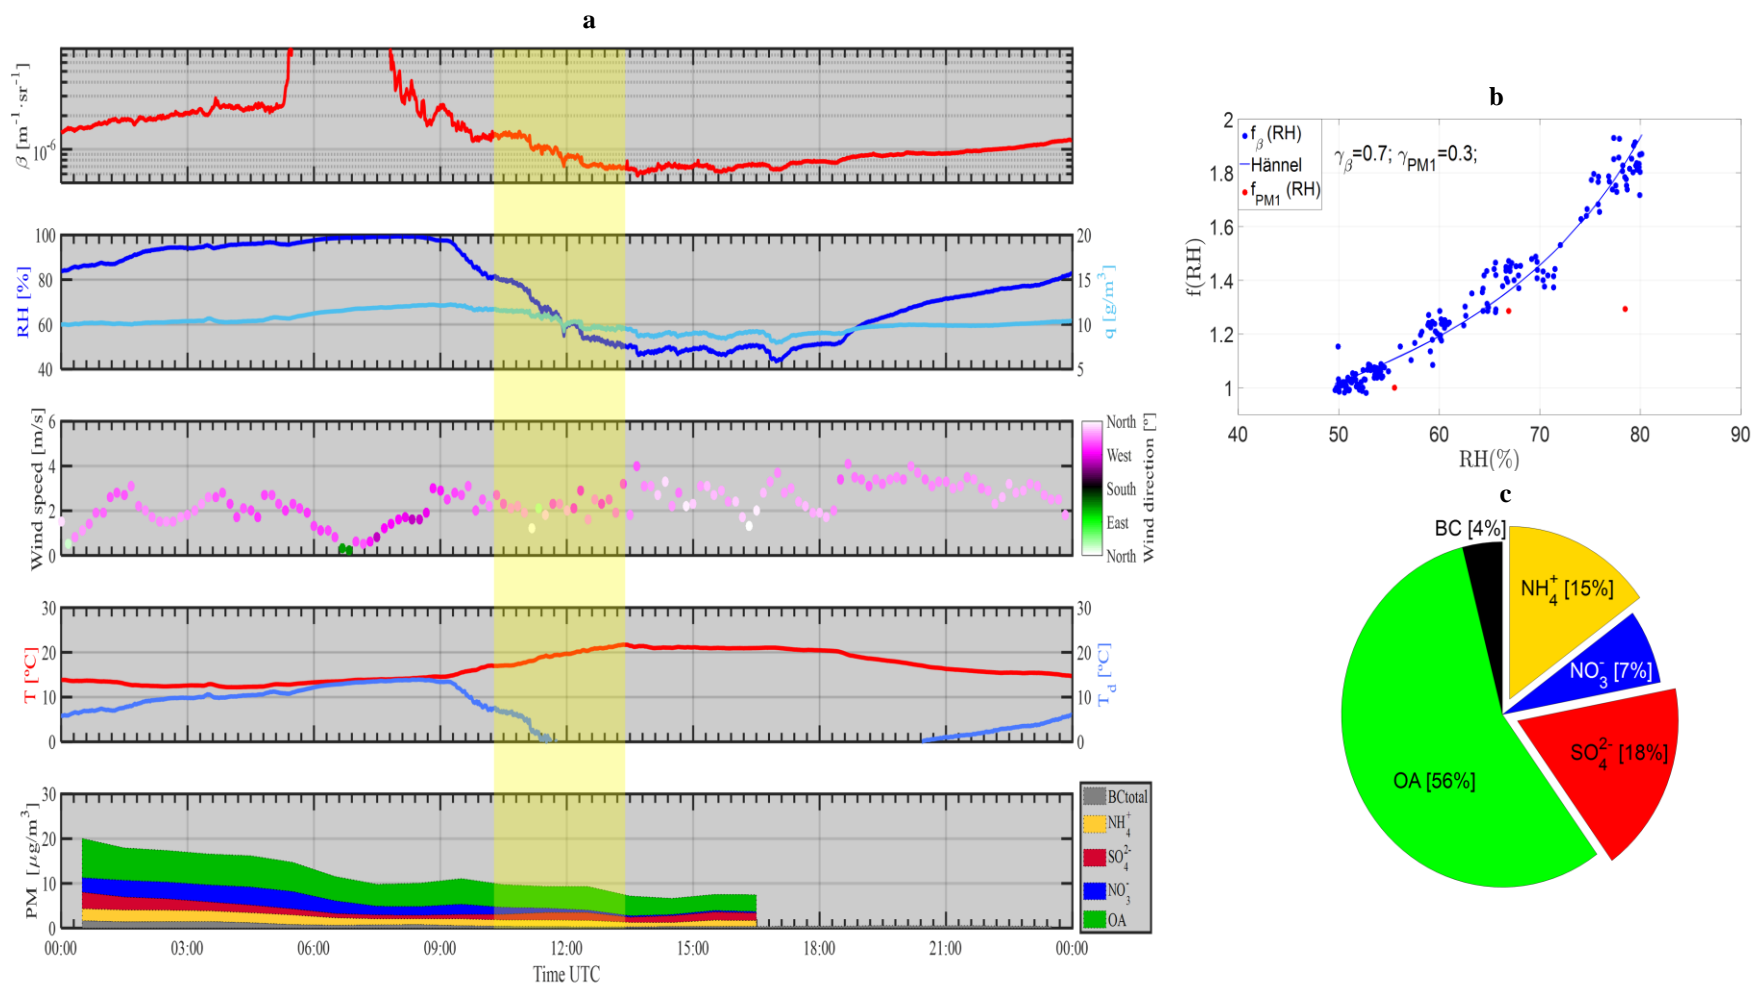

Figure S7:

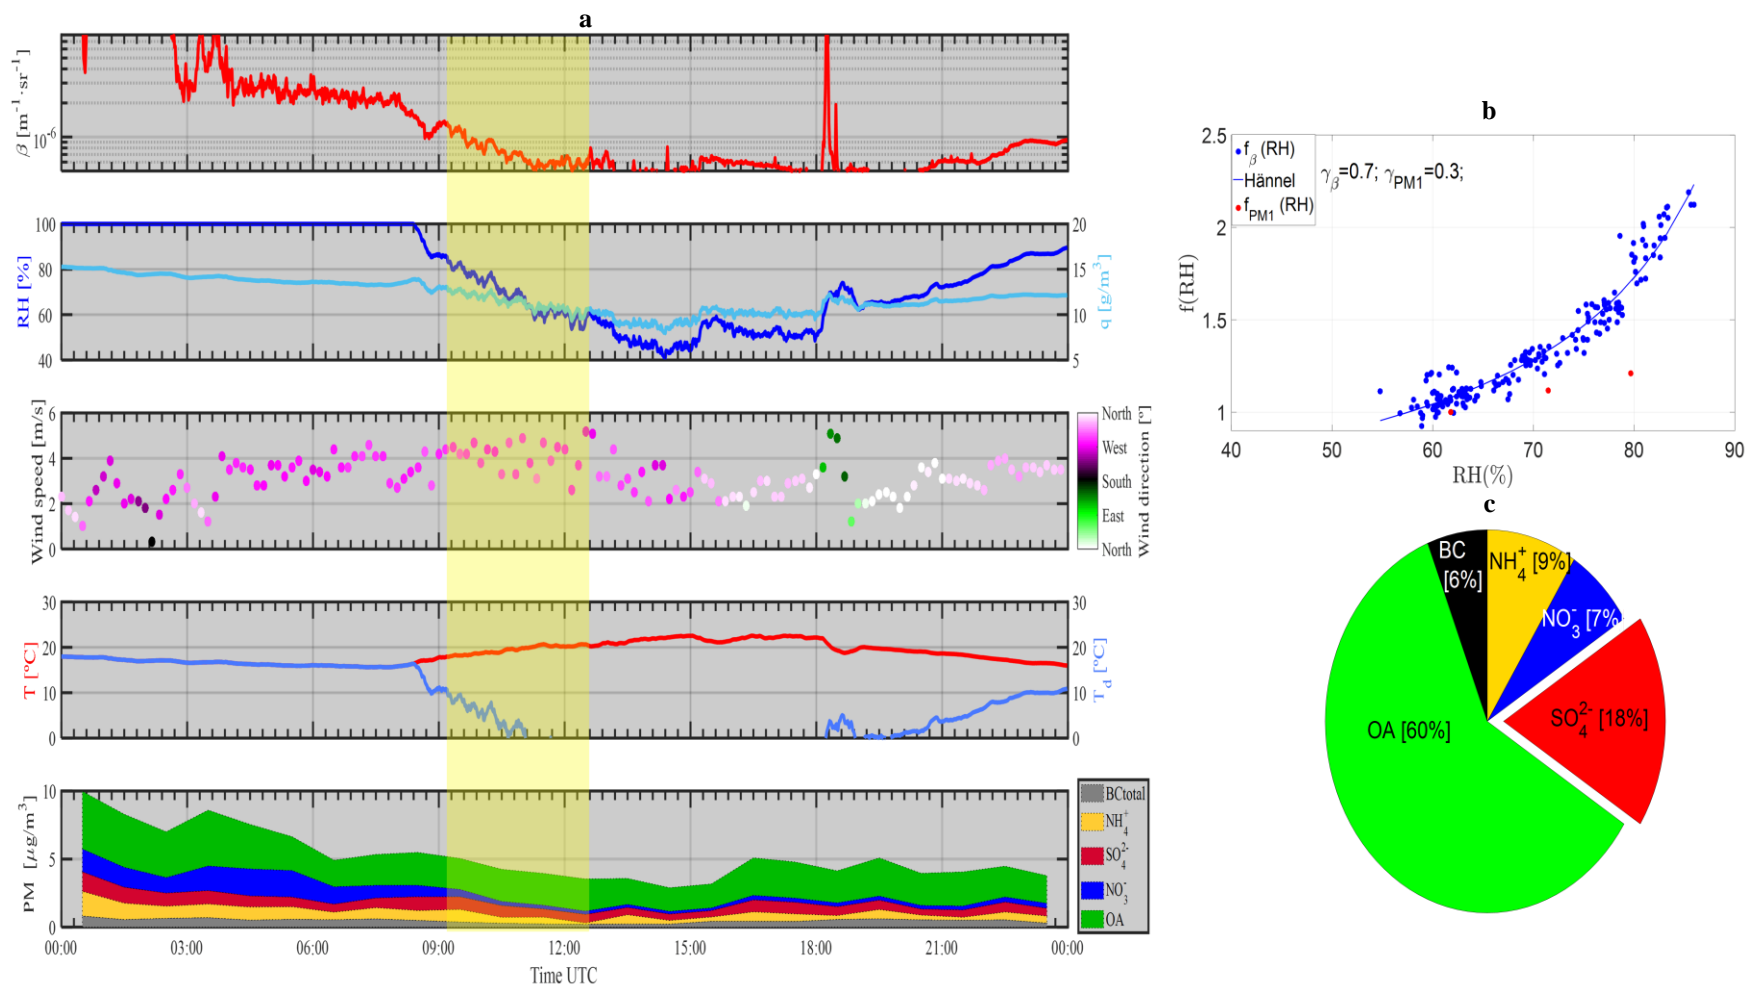

Figure S8:

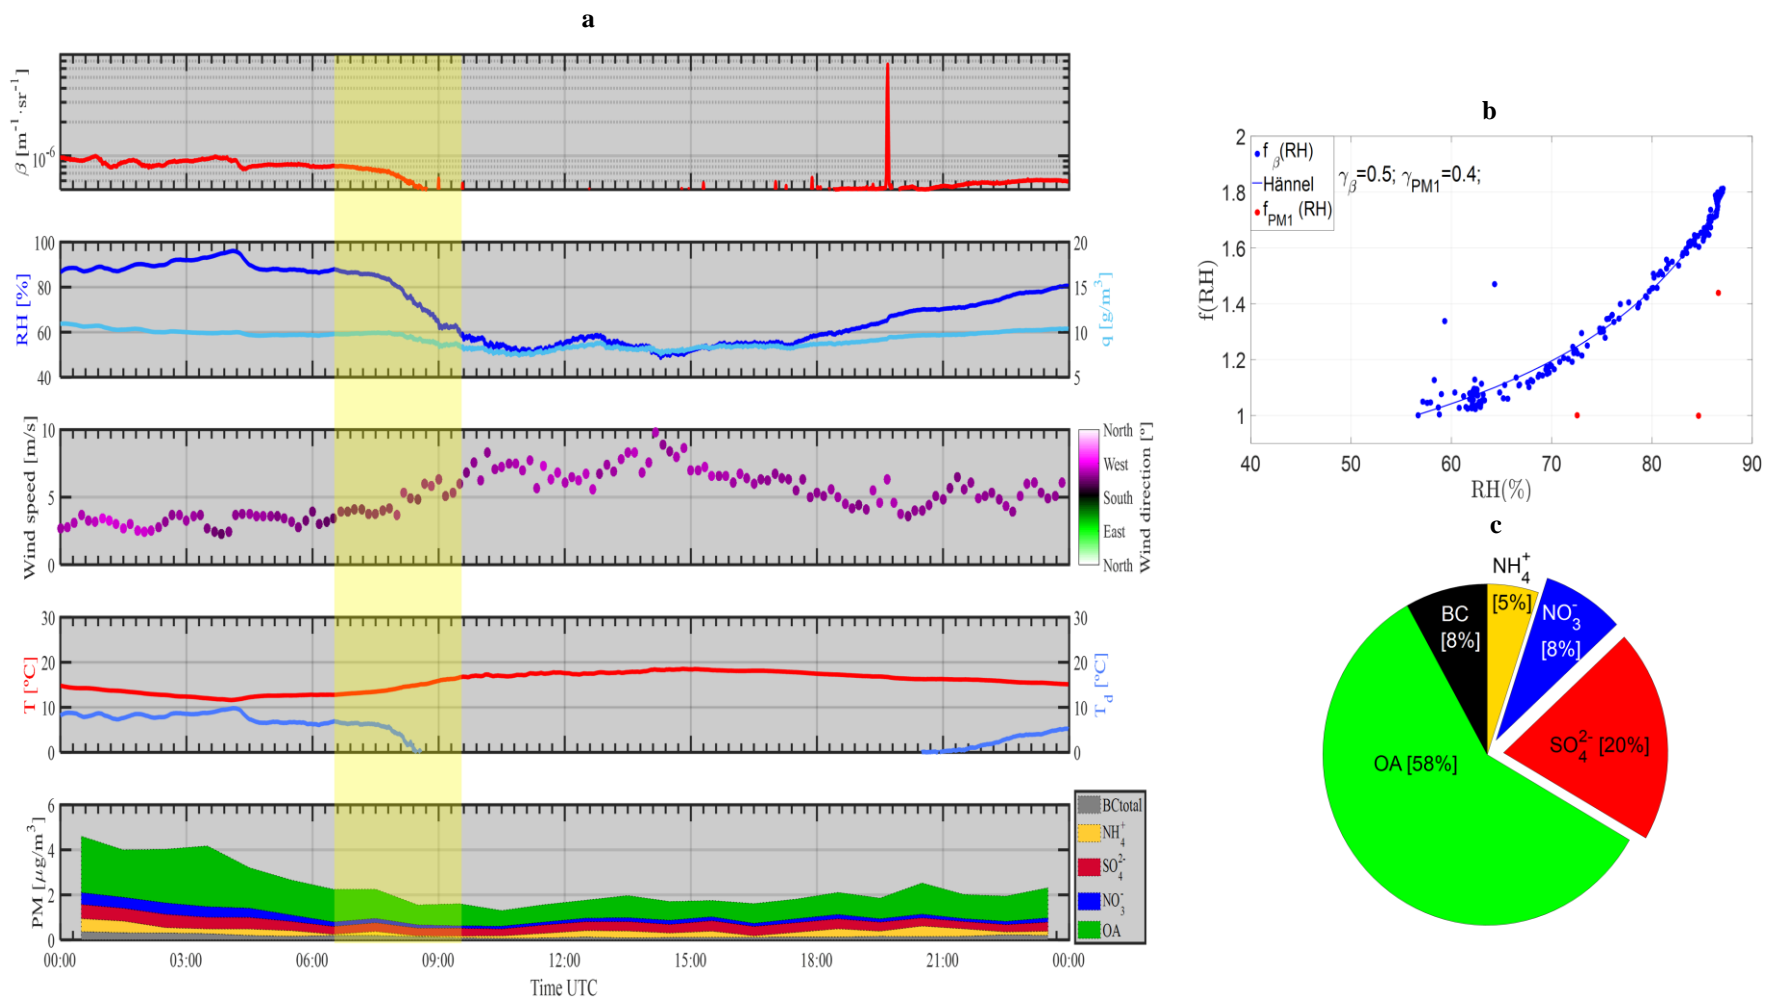

Figure S9:

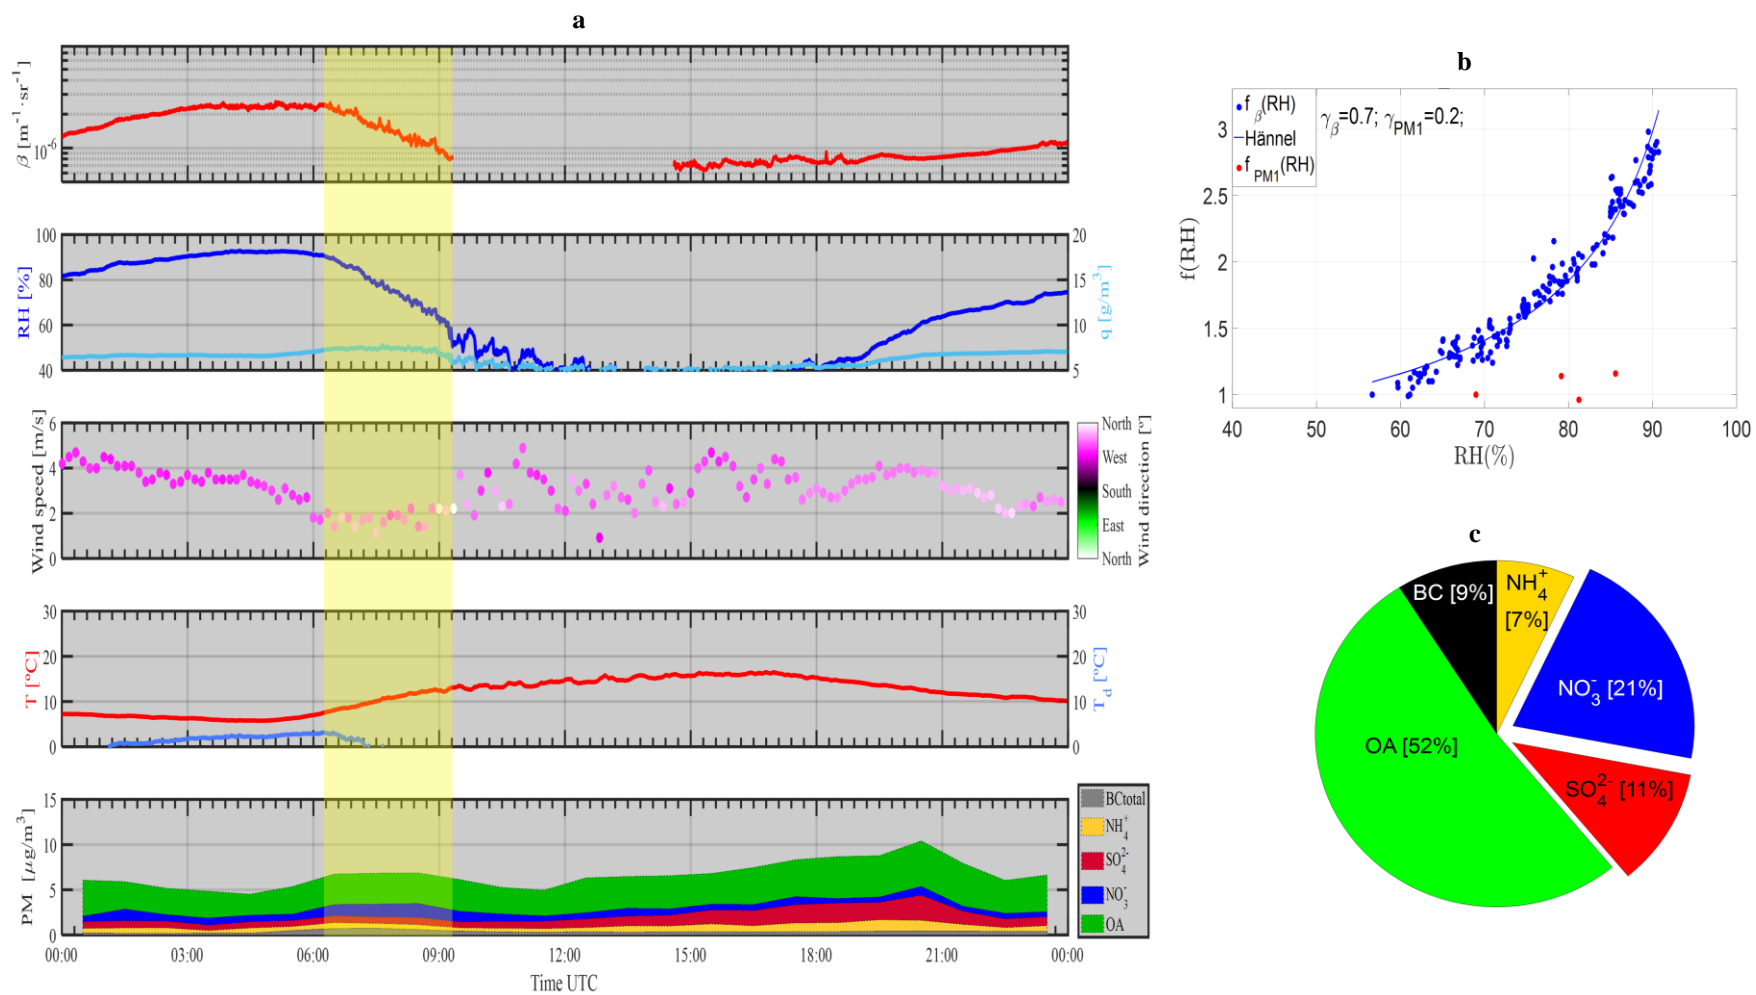

Figure S10

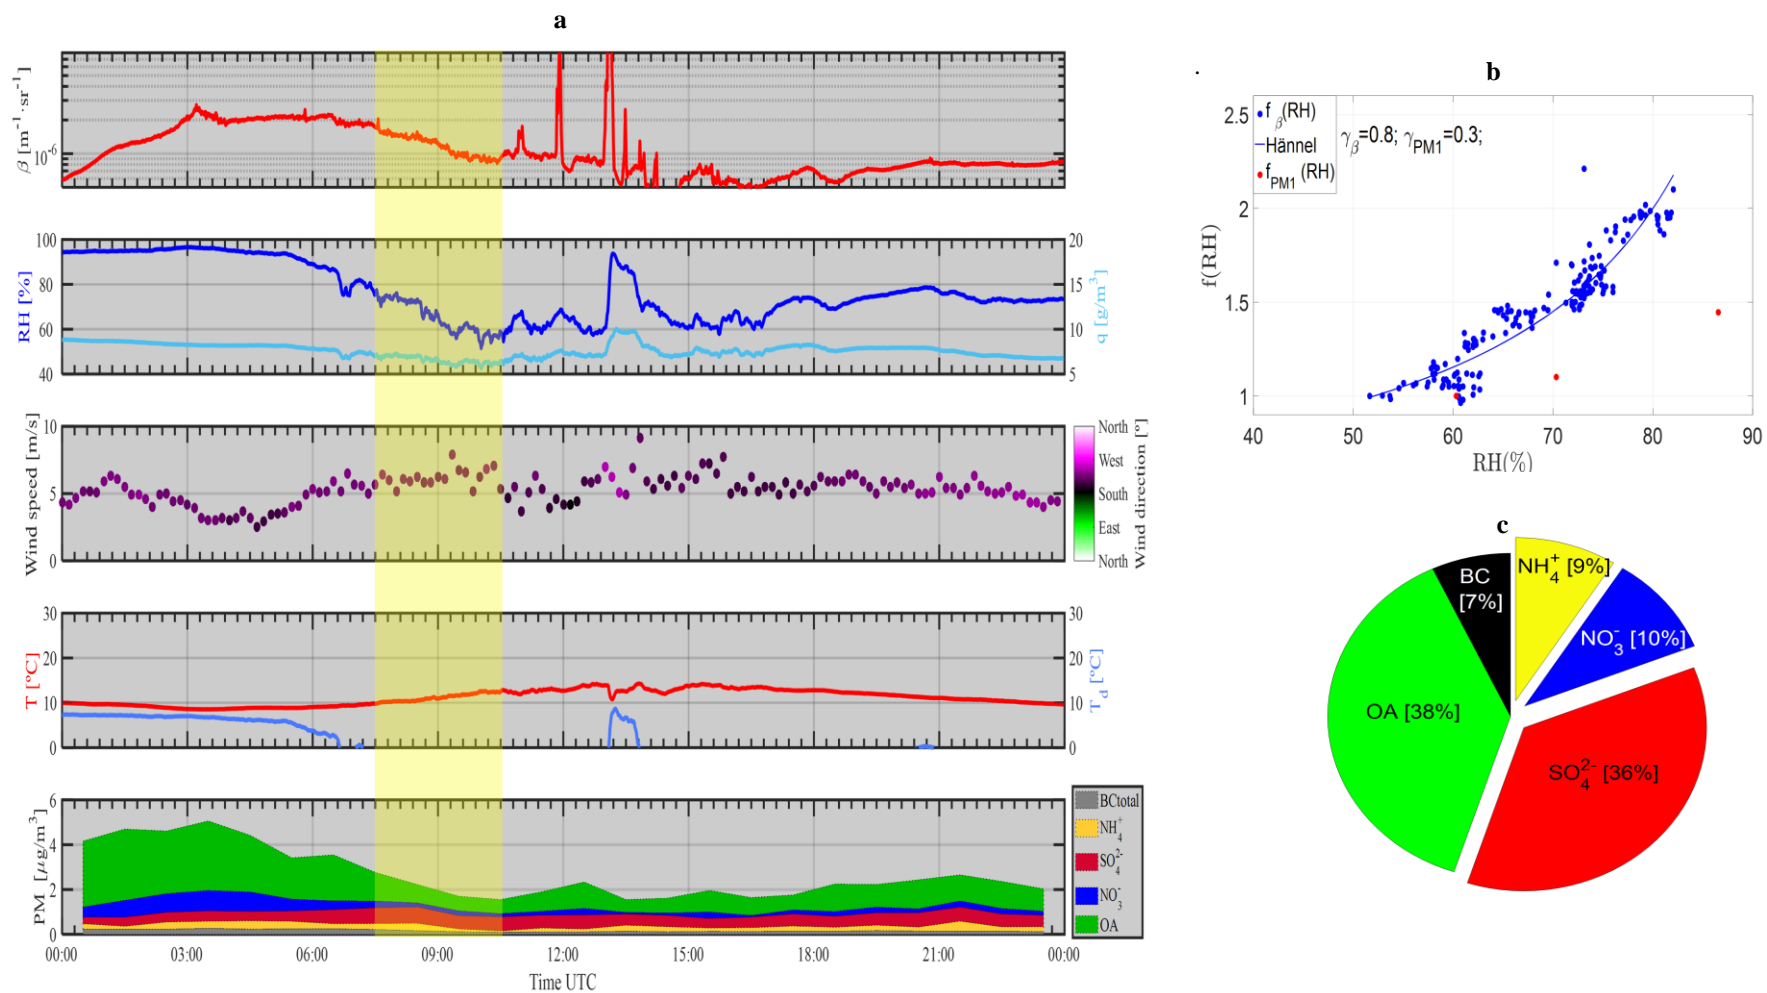

Supplement: Supplementary file 1 [file acp-2019-12-supplement.pdf]
